# Supplementary material for: Atomic-layer tailored organic photodetectors: harnessing intermolecular charge-transfer absorption for expanded spectral sensitivity up to the telecommunication band
Source: Royal Society of Chemistry journal article supplement (doi:10.1039/d4tc02619e), 2024-01-01
Supplement: d4tc02619e1.pdf [file d4tc02619e1.pdf]

## Supporting Information

### **Atomic-Layer Tailored Organic Photodetectors: Harnessing Intermolecular Charge-Transfer Absorption for Expanded Spectral Sensitivity up to Telecommunication Band**

Jiahao Guo<sup>#,a</sup>, Ting Ji<sup>#,\*</sup>, Yang Yang,<sup>a</sup> Linlin Shi,<sup>a</sup> Wenyan Wang,<sup>a</sup> Yao Ma,<sup>b</sup> Liang Shen,<sup>b</sup> Guohui Li<sup>\*,a,c</sup> and Yanxia Cui<sup>\*,a,c</sup>

<sup>a</sup> College of Physics, College of Electronic Information and Optical Engineering, Key Lab of Interface Science and Engineering in Advanced Materials, Key Lab of Advanced Transducers and Intelligent Control System of Ministry of Education, Taiyuan University of Technology, Taiyuan 030024, China E-mail: [jiting@tyut.edu.cn](mailto:jiting@tyut.edu.cn); [liguohui@tyut.edu.cn](mailto:liguohui@tyut.edu.cn); [yanxiacui@tyut.edu.cn](mailto:yanxiacui@tyut.edu.cn)

<sup>b</sup> State Key Laboratory of Integrated Optoelectronics, College of Electronic Science and Engineering, International Center of Future Science, Jilin University, Changchun 130015, China

<sup>c</sup> Shanxi-Zheda Institute of Advanced Materials and Chemical Engineering, Taiyuan 030006, China

<sup>#</sup> The two authors contribute equally to this work

## Calculations

As shown in Fig. S3(a), using the Versa STAT3 electrochemical workstation, the C-V curve of ZnPc was measured at room temperature using cyclic voltammetry in a three electrode battery. The required values for calculating the HOMO of ZnPc were obtained by analyzing the C-V curve. HOMO can be derived from equation (1),

$$HOMO = -(x - 0.22 + 4.8) \quad (1)$$

Where  $x$  is the voltage abscissa value obtained from the C-V curve calculation of ZnPc.

As shown in Fig. S1(b), by analyzing the absorption curve, the absorption band edge of ZnPc can be calculated. The LUMO energy level of ZnPc can be derived from equation (2),

$$LUMO = HOMO - (-y) \quad (2)$$

Where  $y$  is the absorption band boundary value of ZnPc.

## Supplementary Figures

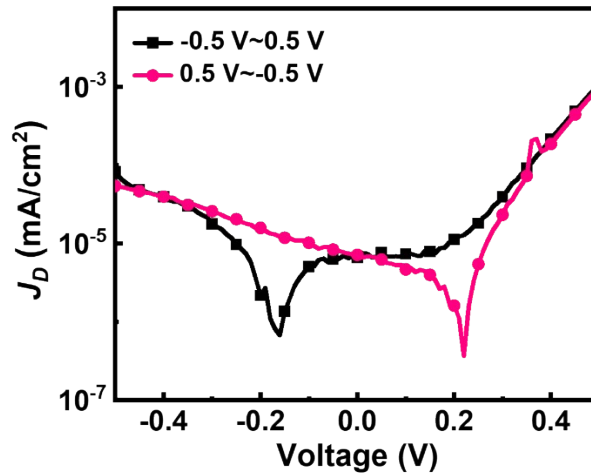

**Fig. S1** The  $J_D$ -V curve of the device scanned from -0.5 V~0.5 V and 0.5 V~ -0.5 V.

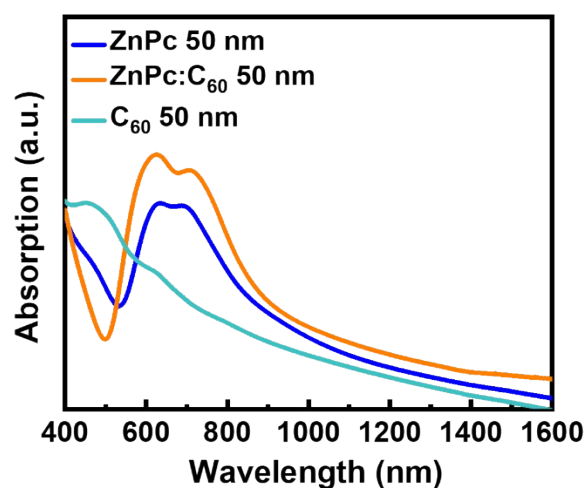

Fig. S2 Absorption spectra of ZnPc, C<sub>60</sub>, and ZnPc: C<sub>60</sub> films with a thickness of 50 nm.

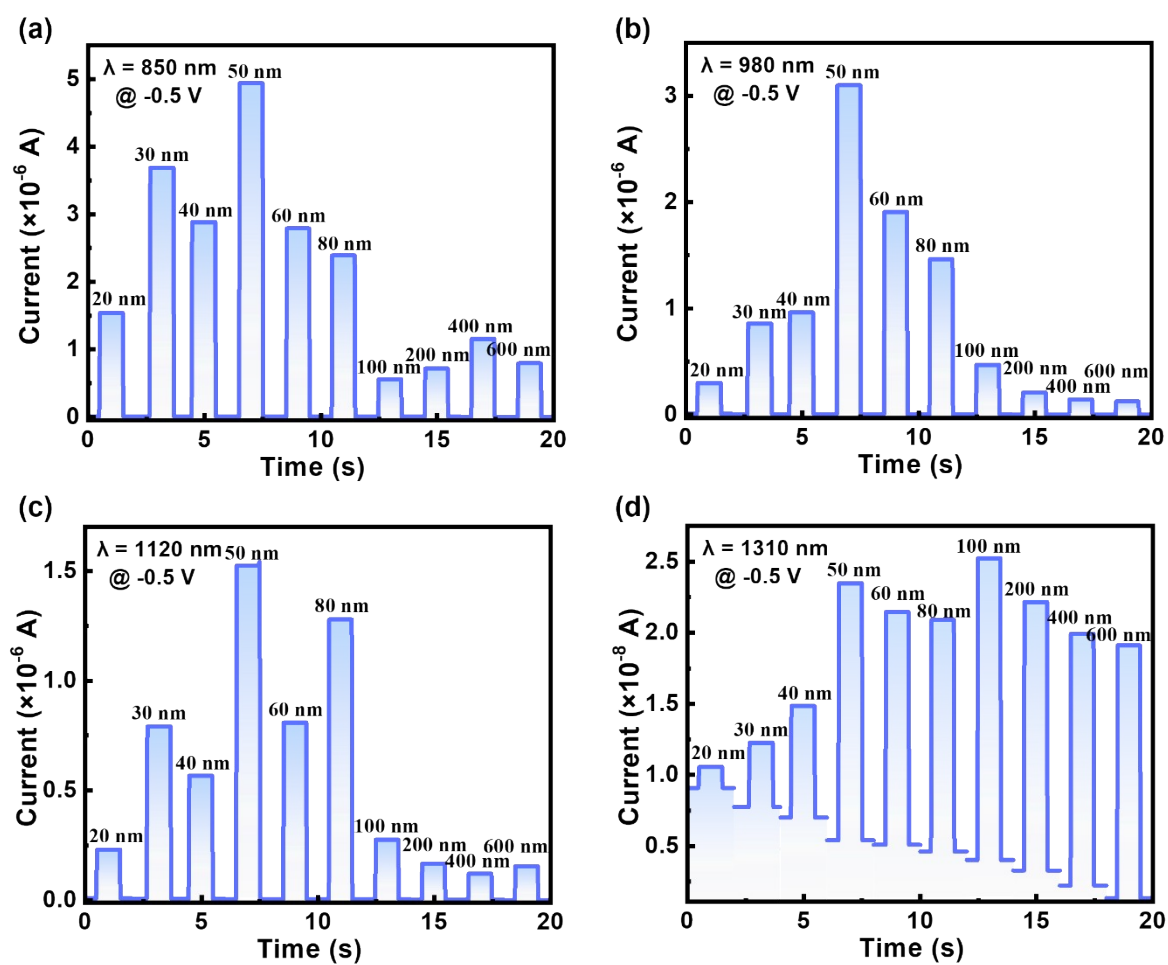

Fig. S3 Transient photocurrent responses of the OPD with different thicknesses of the ZnPc:C<sub>60</sub> layer at 850 nm, 980 nm, 1120 nm, 1310 nm.

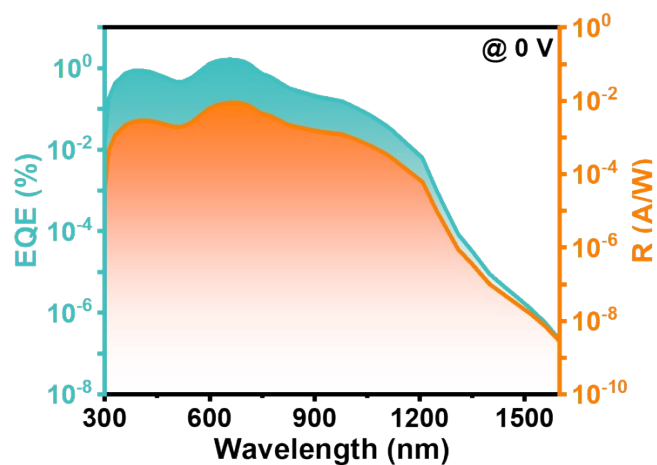

Fig. S4 EQE and R spectra of the  $\text{Al}_2\text{O}_3$ -OPD at 0 V.

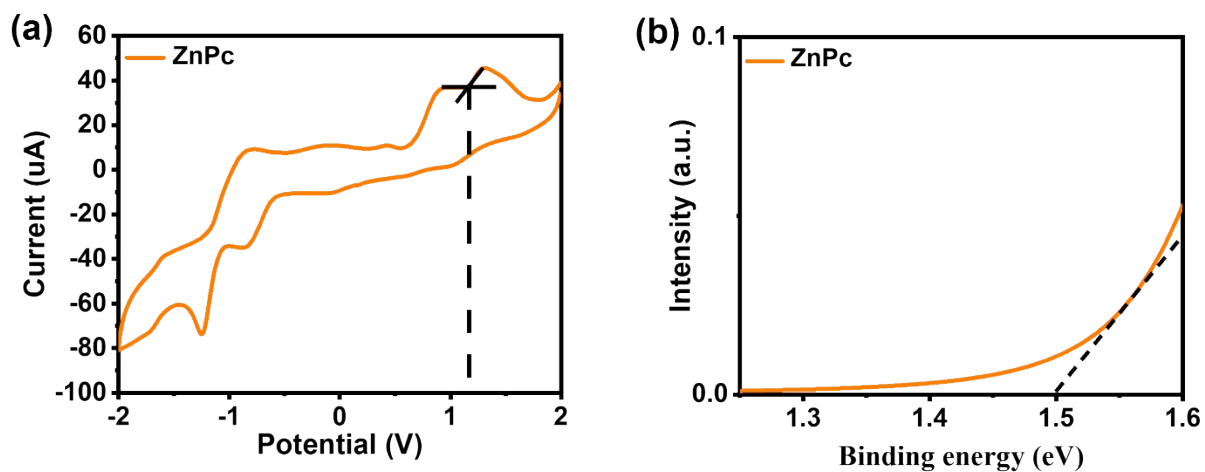

Fig. S5 (a) C-V curves of ZnPc. (b) The absorption band edge of ZnPc.

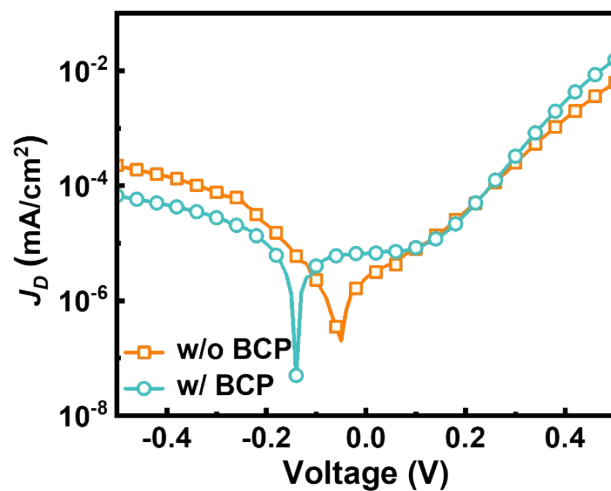

Fig. S6  $J$ - $V$  curves of the control and  $\text{Al}_2\text{O}_3$ -OPD with/without BCP hole blocking layer in dark.

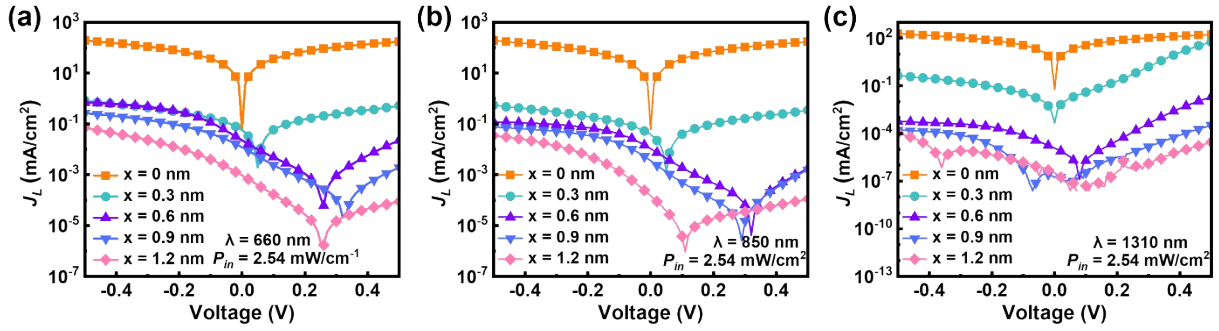

**Fig. S7** (a, b) Photocurrent density curves of Al<sub>2</sub>O<sub>3</sub>-OPD with different thicknesses of Al<sub>2</sub>O<sub>3</sub> tested under 660 nm, 850 nm and 1310 nm LEDs.

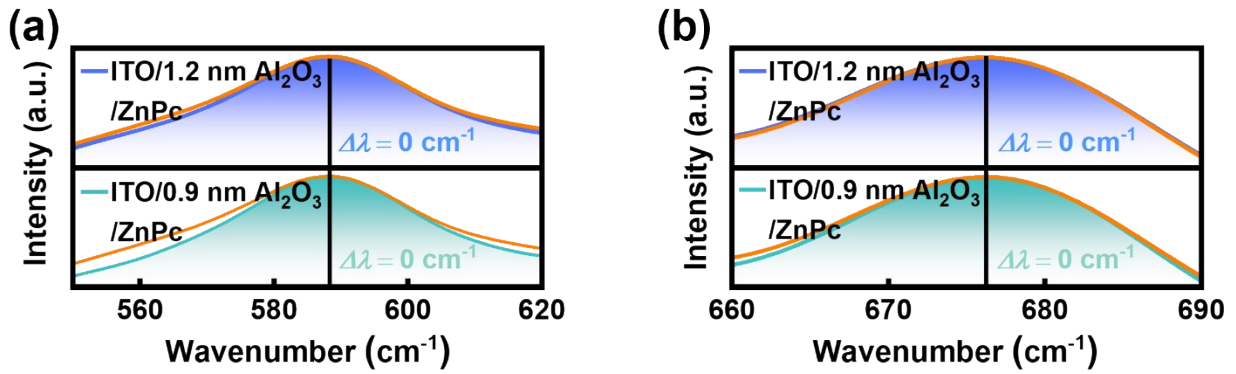

**Fig. S8** (a, b) Raman spectra of the ITO/ZnPc films treated with 0.9 nm and 1.2 nm thick Al<sub>2</sub>O<sub>3</sub>.

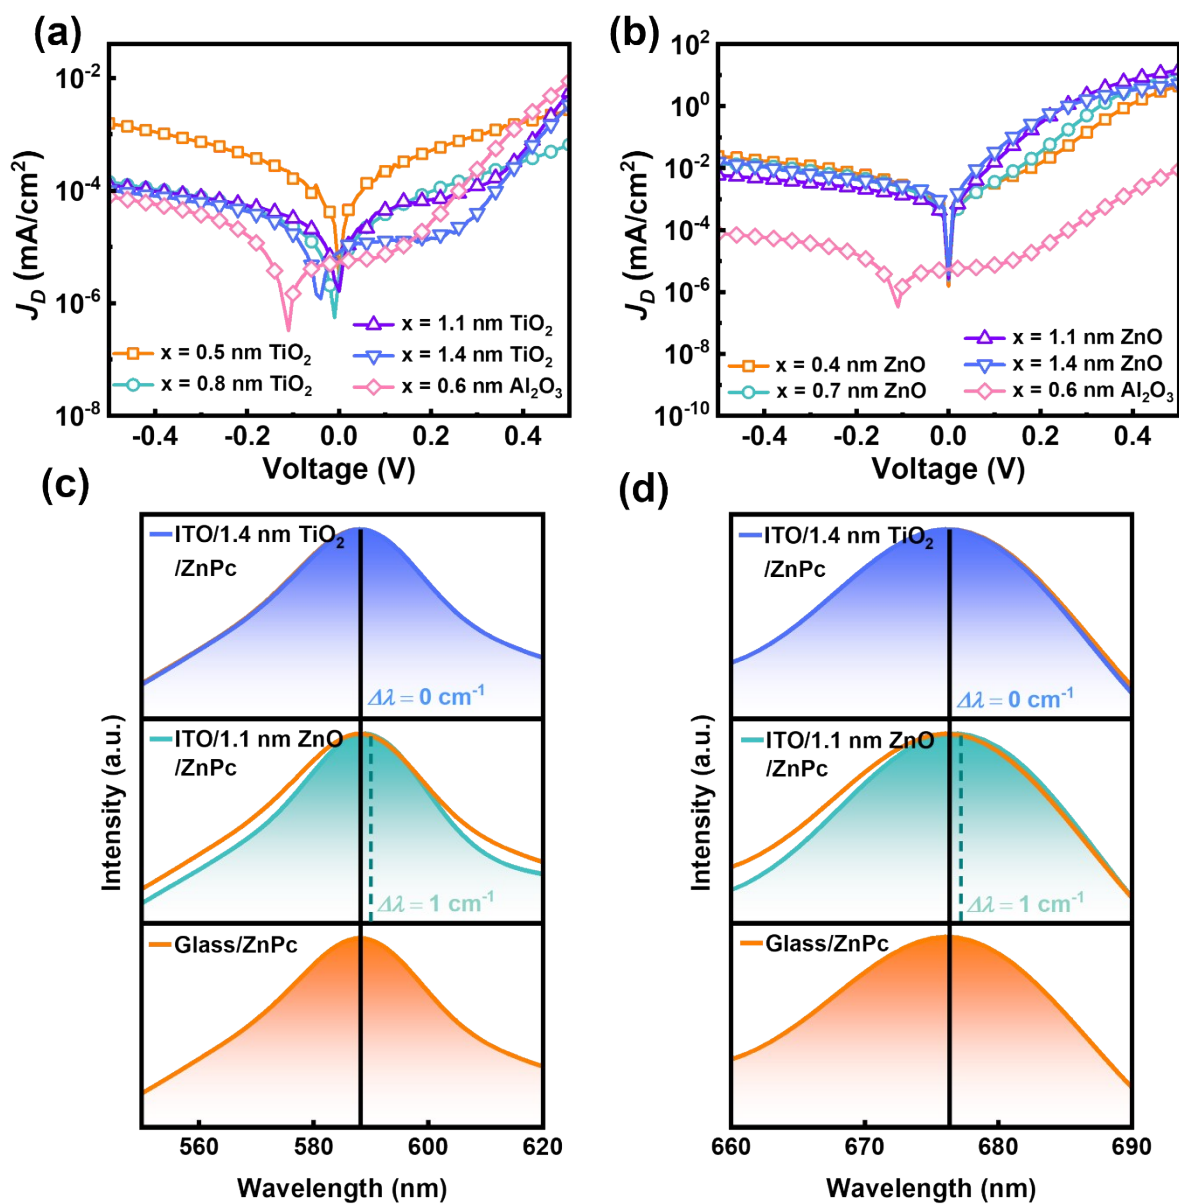

**Fig. S9** (a, b)  $J$ - $V$  curves of devices modified with ZnO and TiO<sub>2</sub> interfacial layers. (c, d) Raman spectra of the glass/ZnPc and ITO/ZnPc films treated with TiO<sub>2</sub> and ZnO.

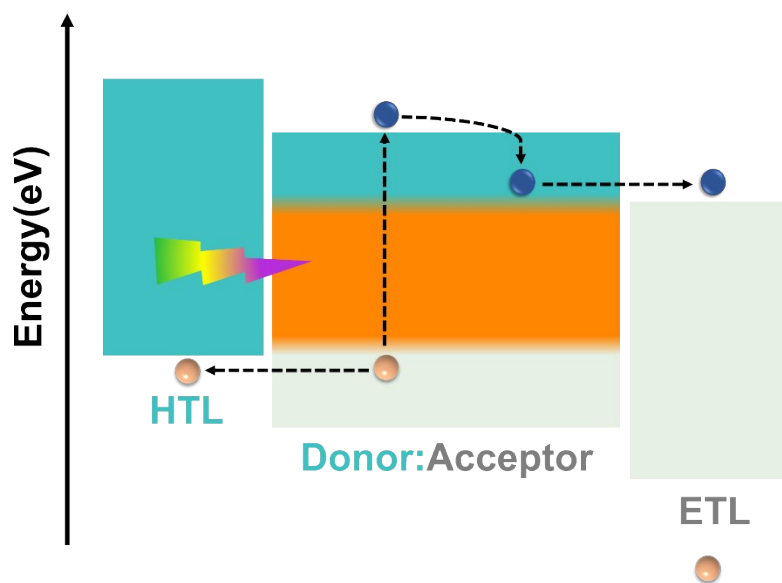

**Fig. S10** Generation and dissociation of excitons when the device is illuminated by a visible light. For simplicity, only absorption of ZnPc is illustrated.

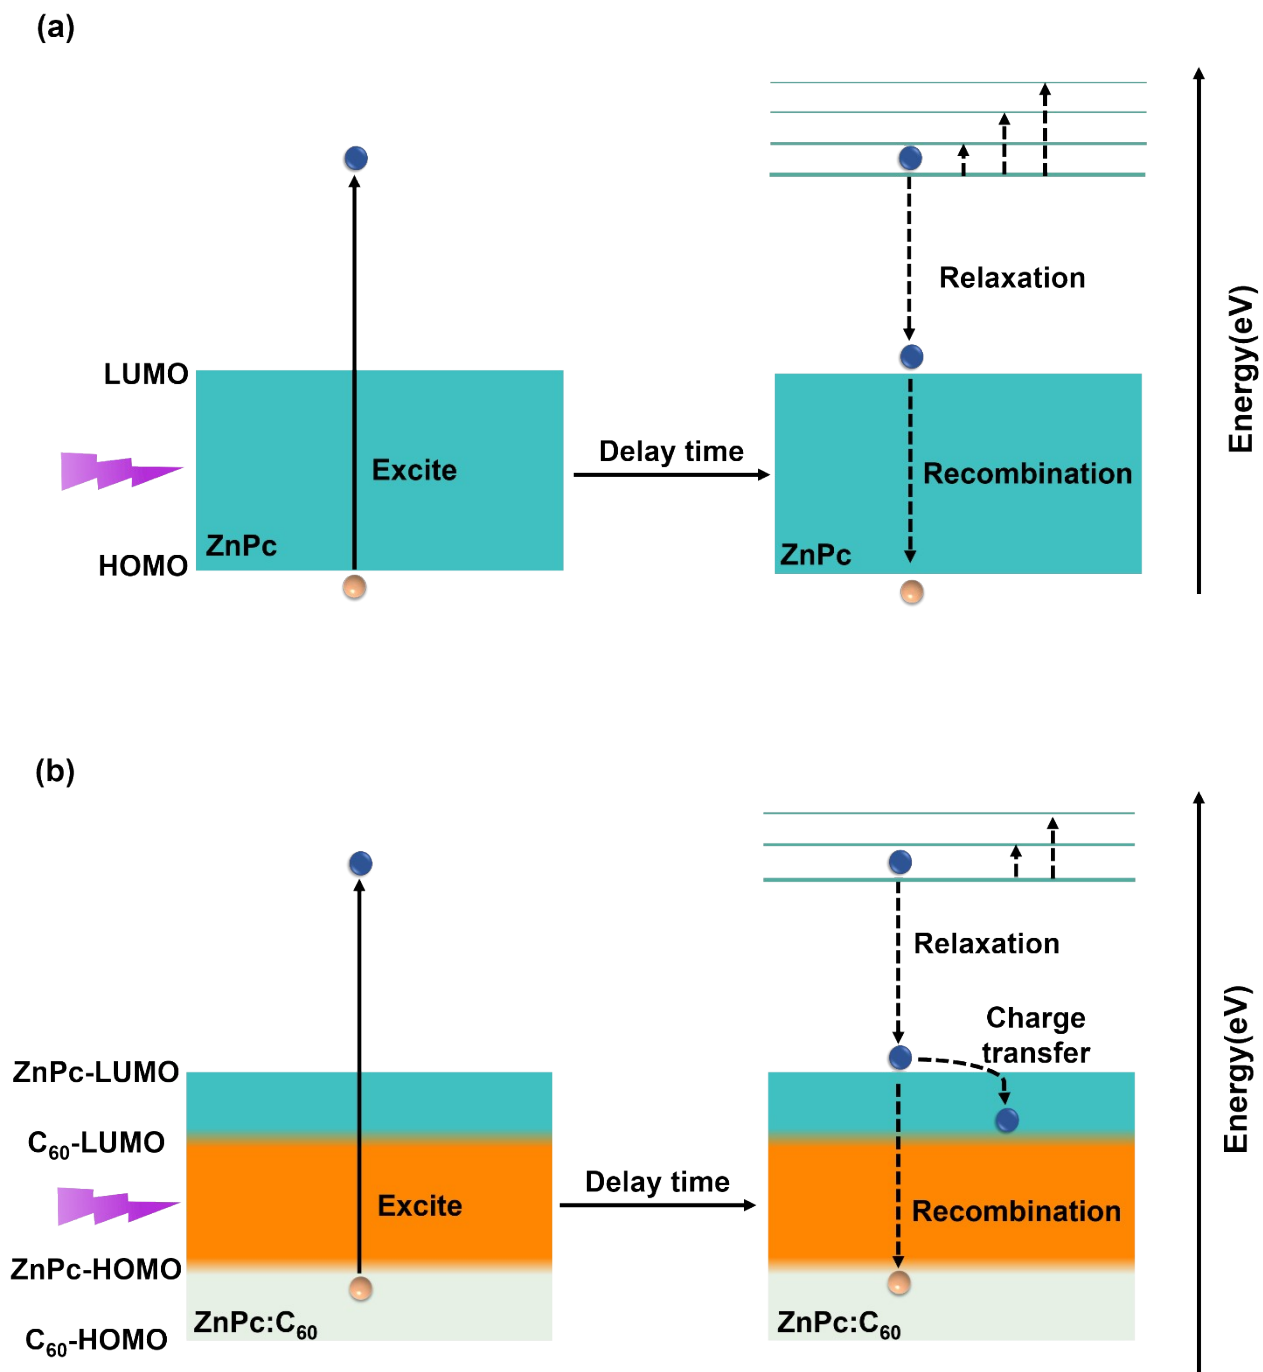

**Fig. S11** Excitation and relaxation processes of electrons in (a) ZnPc film, and (b) ZnPc:C<sub>60</sub> blend film after photoexcitation.
